# Supplementary material for: No changes in the abundance of selected fecal bacteria during increased carbohydrates consumption period associated with the racing season in amateur road cyclists
Source: PeerJ. 2023 Jan 20;11:e14594. doi: 10.7717/peerj.14594 (PMC9869777; doi:10.7717/peerj.14594)
Supplement: Supplemental Information 1 — “kola.I” and “kola.II” are the codes for “cyclists (1st term)” and “2nd term”; “kont” is the code for “control group” [file peerj-11-14594-s001.xlsx]

## Sheet: dane_21.01.2022
													Anaerobic gut microbiota																										Interleukins			Graded exercise test (GXT)
group	code	experience [years]	Age [years]	Body height [cm]	Weight [kg]	Fat [%]	Fat mass [kg]	FFM [kg] - fat free mass	MM [kg] - muscle mass	TBW - Total Body Water [kg]	TBW%	Bone mass [kg]	Bifidocacterium spp.	Bacteroides spp.	F.prausnitzii	A.muciniphila	fecal pH	dietary energy intake [kcal]	Dietary Fat [%]	Dietary protein [%]	Dietary carbohydrates [%]	saccharose [%]	dietary protein [g]	protein [g per kg of body mass]	dietary fat [g]	Dietary fat [g per kg of body mass]	Diteraty cholesterol [mg]	Saturated fatty acids [g]	monounsaturated fatty acids [g]	poliunsaturated fatty acids [g]	omega-3 fatty acids [g]	omega-6 fatty acids [g]	Dietary carbohydrates [g]	Carbohydrates [g per kg of body mass]	Dietary Fibre [g]	Dietary Starch [g]	Dietary lactose [g]	Saccharose [g]	IL-4	IL-12	TNF-alfa	VO2 [ml/kg/min]	Maximum HR[bpm]	Time [min]	Maximum Load [W]	HR [bpm]	Load [W]	group	code
cyclists (1st term)	3	1.5	20	182	75.2	14.4	10.8	64.4	61.5	47.1	62.6	2.9	8000000	1000000000	100000000	2000000	6.5	2227.04	33.27	14.8	51.93	11.59	82.39	1.09561	82.34	1.09495	357.52	17.52	20.89	12.45	1.68	9.97	314.78	4.1859	36.16	131.05	8.62	64.55	0.0469	11.64		64.8	195	21	410	161	250	cyclists (2nd term)	103
cyclists (1st term)	11	2	23	177	76	3.8	2.9	73.1	68.7	53.5	70.4	4.4	2000000	1000000000	500000000	900000	6.5	2392.1	23.25	15.66	61.09	7.16	93.67	1.2325	61.79	0.813026	190.75	22.88	15.68	10.81	0.95	9.76	326	4.28947	27.53	158.49	2.76	42.83	0.414	11.11	14.97	60.5	187	20	390	165	270	cyclists (2nd term)	111
cyclists (1st term)	2	8	25	183	69.7	8.1	5.7	64.1	61.1	46.9	87.7	3	80000000	2000000000	200000000	10000	5.5	4541.53	31.1	17.58	51.32	8.44	199.63	2.86413	156.94	2.25165	792.1	51.28	47.25	19.27	2.12	16.97	617.62	8.86112	67.25	251.83	28.43	95.84	0.0952	12.05	18.405	59.4	179	17.66	350	159	270	cyclists (2nd term)	102
cyclists (1st term)	18	2	35	185	95.1	21.8	20.7	74.4	71	54.5	57.3	3.4	6000000	2000000000	400000000	5000000	6	1654	28.37	13.95	57.69	12.82	57.67	0.606414	52.13	0.54816	191.06	18.27	18.9	10.2	1.01	8.83	250.89	2.63817	14.77	146.54	8.72	53.03	0.8239	13.1	19.465	46.8	179	19	370	159	270	cyclists (2nd term)	118
cyclists (1st term)	17	3	37	200	98	12.6	12.4	85.7	81.7	62.7	64	4	10000000	300000000	90000000	20000000	6	3558.54	34.0788	18.2443	47.6769	9.72072	162.308	1.6562	134.745	1.37495	430.6	28.733	31.2801	16.0994	3.69633	17.7131	440.284	4.49269	22.9077	230.373	12.6517	86.479	0.6351	12.62	21.315	45.9	179	19	370	148	250	cyclists (2nd term)	117
cyclists (1st term)	22	2	39	187	90	7.9	7.1	82.9	79	60.7	67.4	3.9	30000000	500000000	600000000	1000000	6.5	1510.6	29.61	18.27	52.13	8.75	68.98	0.766444	49.69	0.552111	357.07	20.84	16.02	7.55	0.6	6.93	212.21	2.35789	17.05	104.94	4.83	33.04	1.3619	14.39	34.045	51.3	182	16.66	330	164	250	cyclists (2nd term)	122
cyclists (1st term)	26	3	36	178	80.3	15.3	12.3	68	65	49.8	62	3	10000000	300000000	50000000	3000000	6.5	2444.62	35.25	13.81	50.94	14.49	84.41	1.05118	95.75	1.1924	549.64	38.14	36.12	10.29	1.92	8.07	284.12	3.53823	13.62	131.09	11.81	88.57	6.9236	11.5	33.78	54.6	181	18	350	158	250	cyclists (2nd term)	126
cyclists (1st term)	24	4	24	185	72.4	18.1	13.1	59.3	56.7	43.4	59.9	3.1	60000000	2000000000	300000000	0	6.5	3562.74	33.38	19.82	46.8	9.17	176.57	2.43881	132.13	1.825	1140.02	41.29	55.59	21.77	2.21	17.64	450.54	6.22293	36.8	218.01	5.31	81.63	0.6054	12.5	12.325	62.1	187	20.5	410	163	290	cyclists (2nd term)	124
cyclists (1st term)	23	3	38	186	74.7	9.3	7	67.8	64.7	49.6	66.4	3.1	3000000	200000000	40000000	10000000	7.5	2402.25	28.31	13.96	57.73	9.59	83.87	1.12276	75.56	1.01151	265.86	22.75	24.85	10.6	1.38	9.09	327.39	4.38273	15.16	169.14	1.38	57.57	0.1799	12.36	34.58	56.3	186	17.66	350	164	230	cyclists (2nd term)	123
cyclists (1st term)	31	10	30	177	72.6	12.9	9.4	63.2	60.4	46.3	63.8	2.8	4000000	100000000	20000000	0	5.5	2022.83	29.87	15.18	54.95	10.38	76.75	1.05716	67.14	0.924793	327.33	18.35	22.81	9.73	1.55	7.57	296.58	4.08512	25.04	166.12	2.71	52.48	0.9986	14.97	22.9	60.1	201	20	390	172	290	cyclists (2nd term)	131
cyclists (1st term)	30	5	24	195	88.9	20.5	18.2	70.7	67.5	51.8	58.3	3.2	20000000	700000000	200000000	2000000	7	3654.21	45.1906	13.2525	41.5568	7.19689	121.069	1.36185	183.484	2.06394	680.383	34.0522	54.5369	22.4538	3.9026	15.6572	393.617	4.42764	32.0317	188.74	1.09	65.7473	1.4569	11.37	12.325	63	195	22	430	173	330	cyclists (2nd term)	130
cyclists (1st term)	15	3	44	170	68.7	14.6	10	58.7	55.8	61.7	61.7	2.9	50000000	700000000	500000000	900000	6.5	2400.53	33.5	13.78	52.71	9.18	82.72	1.20408	89.36	1.30073	291.38	27.8	27.85	22.19	2.16	19.09	337.66	4.91499	26.08	157.76	20.63	55.1	0.6765	13.19	21.315	51.3	178	16.5	330	144	210	cyclists (2nd term)	115
cyclists (1st term)	32	22	37	178	71.3	8.2	5.9	65.5	62.5	48	67.3	3	1000000	400000000	200000000	3000	6.5	2132.17	31.78	14.77	53.45	14.49	78.73	1.10421	75.3	1.0561	406.9	14.63	22.73	8.59	1.37	7.16	277.56	3.89285	17.37	85.38	0.56	77.25	0.7845	11.85	19.465	51.2	172	17	330	190	139	cyclists (2nd term)	132
cyclists (1st term)	33	5	36	188	64.2	9.9	6.4	57.8	55.3	42.3	65.9	2.5	300000	900000000	100000000	0	7	2066.58	36.96	12.06	50.98	22.38	62.3	0.970405	84.86	1.32181	469.15	25.55	28.23	22.6	1.53	20.15	287.49	4.47804	23.98	108.94	8.34	115.61	1.6705	13.44	9.145	58.1	181	19	370	290	167	cyclists (2nd term)	133
control group	38		35	183	99.8	27.5	27.5	72.3	68.8	50.1	50.2	3.6	2000000	3000000000	10000000	0	6.5	2038.05	44.0708	17.9515	37.9777	4.94446	91.46	0.916433	99.7983	0.999983	302.417	36.0219	38.1897	19.0631	2.29416	11.4273	204.698	2.05108	12.1517	129.09	4.00333	25.1927				27.6	168	12	230	139	150
control group	8		37	188	104	24.6	25.6	78.4	74.8	57.4	55.2	3.6	10000000	1000000000	70000000	3000000	6	1622.45	35.5251	18.7063	45.7686	2.2712	75.875	0.729567	64.0417	0.615786	180.3	23.2244	20.6907	5.54485	1.0572	4.47065	200.846	1.93121	15.4832	88.1417	5.4275	9.21225	2.4324	11.03	15.03	27.8	163	10.75	210	123	110
control group	9		39	185	102.1	20.7	21.1	81	77.2	59.3	58.1	3.8	20000000	2000000000	200000000	30000000	6.5	799.127	41.6067	21.5168	36.8765	2.50273	42.9867	0.421025	36.9433	0.361835	398.04	10.7571	12.0419	4.54287	0.510133	4.0126	84.774	0.830304	11.34	45.71	0.913333	5	3.5776	10.47	12.59	34.3	188	16	310	139	210
control group	10		22	175	75.6	6.6	5	70.6	67.4	51.7	68.4	3.2	800000	2000000000	30000000	50000	5	1044.62	37.9819	21.3086	40.7095	1.29362	55.6483	0.736089	44.085	0.583135	204.5	11.0725	16.3643	7.58067	1.54067	4.19967	114.002	1.50796	8.71833	80.3317	1.01333	3.37833	8.6714	11.53	7.815	42.9	177	13.5	270	146	150
control group	7		20	181	78	8.3	6.5	71.5	68.3	52.3	67.1	3.2	2000000	3000000000	80000000	100000	6	5190.27	31.03	14.43	54.54	29	187.28	2.40103	178.94	2.2941	1097.8	39.8	45	15.75	4.95	12.08	735.1	9.42436	34.61	171.07	5.5	38.43	7.9991	11.37		46.4	191	14	270	156	170
control group	13		24	185	70.7	6	4.2	63.4	63.4	48.7	68.9	3.1	4000000	50000000	9000000	0	5.5	3232.58	36.11	21.4	42.5	3.65	172.91	2.44569	129.68	1.83423	417.94	55.62	33.53	17.71	1.01	11.13	384.15	5.43352	41.72	128.28	8.58	27.54	6.5728	10.76	16.03	50	183	14	270	159	190
control group	12		24	182	72.4	15.6	11.3	61.1	58.4	44.7	61.7	2.7	50000000	600000000	30000000	20000000	6	2459.15	36.58	15.38	48.04	2.25	94.56	1.30608	99.95	1.38052	281.65	25.3	29.43	9.6	1.72	6.68	296.94	4.10138	22.93	219.42	4.7	13.81	9.348	10.47		45.2	196	14	270	154	150
control group	27		23	178	73.5	14.5	10.7	62.8	60	46	62.6	2.8	80000000	100000000	200000000	4000000	5.5	2673.77	35.23	23.98	45.79	4.33	160.28	2.18068	104.66	1.42395	966.75	29.73	46.56	19.96	1.79	9.65	307.33	4.18136	35.28	203.17	15.13	28.96	1.6423	12.74	13.12	44.8	195	14	270	160	150
control group	25		24	180	73.1	15.8	11.6	61.6	58.7	45.1	61.7	2.9	20000000	500000000	200000000	30000000	6.5	5132.92	34.9	19.3	48.04	6.58	254.84	3.48618	204.61	2.79904	1248.4	55.03	75.99	29.56	3.51	16.33	604.27	8.26635	58.21	422.59	19.83	42.77	9.4857			49.4	188	15	290	163	170
control group	1		33	182	92.8	20.3	18.8	74	70.7	54.2	54.2	3.3	2000000	2000000000	20000000	10000000	6.5	2946.7	47.71	22.19	30.1	7.54	163.44	1.76121	156.22	1.68341	764.72	38.8	52.24	34.36	2.16	14.14	241.99	2.60765	22.1	95.9	7.66	55.58	5.3724	17.77	16.03	35.4	186	14	270	144	170
control group	14		42	179	71.2	6.5	4.6	66.6	63.6	48.8	68.5	3	30000000	1000000000	800000000	0	5	2265.62	35.28	28.4	36.32	0.91	160.86	2.25927	88.81	1.24733	943	18.37	47.21	15.25	3.12	11.69	237.89	3.34115	35.04	178.96		5.18	3.4154	10.78	16.53	37.2	178	11	210	132	130
control group	39		39	191	103.1	24.9	25.7	77.4	73.6	52	50.4	3.8	20000000	200000000	200000000	10000000	6.5	2606.16	41.5	25.295	33.21	4.225	162.15	1.57274	122.515	1.18831	853.86	28.585	49.725	24.805	2.64	12.915	239.94	2.32726	28.57	137.43	7.66	30.38	6.6083	11.64	11.27	38.4	191	16	290	159	210
control group	5		21	175	76.6	17.5	13.4	63.2	60.1	46.3	60.4	3.1	40000000	200000000	100000000	7000000	7	3232.58	36.11	21.4	42.5	3.65	172.91	2.25731	129.68	1.69295	417.94	55.62	33.53	17.71	1.01	11.13	384.15	5.01501	41.72	128.28	8.58	27.54	0.9573	10.68	14.7	45.4	197	15	290	164	150
[truncated: 46 more columns]
