# Supplementary material for: No changes in the abundance of selected fecal bacteria during increased carbohydrates consumption period associated with the racing season in amateur road cyclists
Source: PeerJ. 2023 Jan 20;11:e14594. doi: 10.7717/peerj.14594 (PMC9869777; doi:10.7717/peerj.14594)
Supplement: Supplemental Information 2 — E.g. mean, median, minimum, maximum, upper and lower quartile, standard deviation, normality tests [file peerj-11-14594-s002.xlsx]

## Sheet: Basic statistics
Both groups at baseline
	Descriptive statistics
Variables	Group size (n)	Mean	Median	Minimum	Maximum	Upper quartile	Lower quartile	Standard deviation	Coefficient of variation	Standard error
Age [years]	25	30.72	33	20	44	24	37	7.754	25.2413	1.5508
Body height [cm]	25	182.56	182	170	200	178	185	6.41	3.5113	1.282
Weight [kg]	25	80.552	75.6	64.2	104	72.4	90	11.87	14.736	2.374
Fat [%]	25	13.82	14.4	3.8	27.5	8.2	18.1	6.373	46.1157	1.2746
Fat mass [kg]	25	11.624	10.7	2.9	27.5	6.4	13.4	6.824	58.7056	1.3648
FFM [kg] - fat free mass	25	68.82	67.8	57.8	85.7	63.2	73.1	7.605	11.0501	1.5209
MM [kg] - muscle mass	25	65.744	64.7	55.3	81.7	60.4	68.8	7.145	10.8675	1.4289
TBW - Total Body Water [kg]	25	51.112	49.8	42.3	62.7	46.9	54.2	5.716	11.184	1.1433
TBW%	25	63.6	62.6	50.2	87.7	59.9	67.3	7.153	11.2475	1.4307
Bone mass [kg]	25	3.224	3.1	2.5	4.4	3	3.4	0.444	13.7635	0.0887
fecal pH	25	6.22	6.5	5	7.5	6	6.5	0.63	10.1363	0.1261
dietary energy intake [kcal]	25	2562.99	2400.53	799.127	5190.27	2038.05	3232.58	1012.36	39.4991	202.471
Dietary Fat [%]	25	34.846	35.23	23.25	47.71	31.1	36.58	5.557	15.9469	1.1114
Dietary protein [%]	25	17.672	17.58	12.06	28.4	14.43	21.309	4.026	22.7805	0.8052
Dietary carbohydrates [%]	25	47.683	48.04	30.1	61.09	42.5	52.71	7.662	16.0689	1.5324
saccharose [%]	25	8.708	8.44	0.91	29	3.65	10.38	6.531	75.0055	1.3063
dietary protein [g]	25	112.371	91.46	42.987	199.63	76.75	162.308	49.212	43.7941	9.8424
dietary fat [g]	25	98.961	89.36	36.943	183.484	67.14	129.68	41.515	41.9505	8.3029
Dietary cholesterol [mg]	25	496.993	406.9	180.3	1140.02	291.38	680.383	291.96	58.7454	58.3921
Saturated fatty acids [g]	25	29.056	25.55	10.757	55.62	18.37	38.14	12.868	44.2854	2.5735
monounsaturated fatty acids [g]	25	31.901	29.43	12.042	55.59	20.89	45	13.27	41.5973	2.654
poliunsaturated fatty acids [g]	25	14.867	15.25	4.543	34.36	9.73	19.27	6.943	46.7032	1.3887
omega-3 fatty acids [g]	25	1.89	1.68	0.51	4.95	1.057	2.16	1.063	56.2386	0.2125
omega-6 fatty acids [g]	25	11.008	9.97	4.013	20.15	7.57	14.14	4.691	42.6146	0.9382
Dietary carbohydrates [g]	25	320.344	296.94	84.774	735.1	241.99	384.15	139.394	43.5139	27.8789
Dietary Fibre [g]	25	26.274	23.98	8.718	67.25	15.483	35.04	13.072	49.7535	2.6144
Dietary Starch [g]	25	148.67	146.54	45.71	251.83	108.94	178.96	52.075	35.0271	10.415
Dietary lactose [g]	25	7.174	5.427	0	28.43	2.71	8.62	6.68	93.1198	1.3361
Saccharose [g]	25	62.217	53.03	3.378	384.3	27.54	77.25	73.928	118.823	14.7856
IL-4	19	3.436	1.671	0.605	9.348	0.957	6.573	3.038	88.3951	0.6969
IL-12	24	12.237	11.745	10.47	17.77	11.07	12.92	1.682	13.7473	0.3434
TNF-alfa	21	18.375	16.03	7.815	34.58	13.12	21.315	7.64	41.5758	1.6671
VO2 [ml/kg/min]	25	48.896	50	27.6	64.8	44.8	58.1	10.637	21.7549	2.1275
Maximum HR[bpm]	25	184.16	183	163	201	179	191	9.388	5.0979	1.8777
Time [min]	25	16.489	16.66	10.75	22	14	19	3.171	19.2288	0.6341
Maximum Load [W]	25	322	330	210	430	270	370	63.509	19.7231	12.7017
HR [bpm]	25	161.04	159	123	290	146	164	30.356	18.8497	6.0711
Load [W]	25	207.84	210	110	330	150	250	61.092	29.3937	12.2184
Bifidocacterium spp.	25	6.923	7	5.48	7.9	6.3	7.48	0.683	9.8633	0.1366
Bacteroides spp.	25	8.83	8.95	7.7	9.48	8.48	9.3	0.493	5.5841	0.0986
F.prausnitzii	25	8.007	8	6.95	8.9	7.6	8.3	0.553	6.9097	0.1106
A.muciniphila	18	6.126	6.39	3.48	7.48	5.95	7	1.142	18.6466	0.2692
Groups aggregated
	Aggregated data
Variable
	Group name	Group size (n)	Mean	Median	Minimum	Maximum	Upper quartile	Lower quartile	Standard deviation	Coefficient of variation	Standard error
Age [years]	Cyclists (1st term)	14	32	35.5	20	44	24	37	7.473	23.3532	1.9973
Body height [cm]	Cyclists (1st term)	14	183.643	184	170	200	178	187	7.7321	4.2104	2.0665
Weight [kg]	Cyclists (1st term)	14	78.364	74.95	64.2	98	71.3	88.9	10.4977	13.396	2.8056
Fat [%]	Cyclists (1st term)	14	12.671	12.75	3.8	21.8	8.2	15.3	5.1826	40.8997	1.3851
Fat mass [kg]	Cyclists (1st term)	14	10.136	9.7	2.9	20.7	6.4	12.4	4.9553	48.8893	1.3244
FFM [kg] - fat free mass	Cyclists (1st term)	14	68.257	66.65	57.8	85.7	63.2	73.1	8.4687	12.4071	2.2634
MM [kg] - muscle mass	Cyclists (1st term)	14	65.064	63.6	55.3	81.7	60.4	68.7	8.0065	12.3055	2.1398
TBW - Total Body Water [kg]	Cyclists (1st term)	14	51.307	49.7	42.3	62.7	46.9	54.5	6.5823	12.8292	1.7592
TBW%	Cyclists (1st term)	14	65.336	63.9	57.3	87.7	61.7	67.3	7.4161	11.3507	1.982
Bone mass [kg]	Cyclists (1st term)	14	3.229	3.05	2.5	4.4	2.9	3.4	0.5239	16.228	0.14
fecal pH	Cyclists (1st term)	14	6.429	6.5	5.5	7.5	6	6.5	0.5497	8.5513	0.1469
dietary energy intake [kcal]	Cyclists (1st term)	14	2612.12	2396.32	1510.6	4541.53	2066.58	3558.54	873.899	33.4555	233.559
Dietary Fat [%]	Cyclists (1st term)	14	32.423	32.525	23.25	45.191	29.61	34.079	5.0475	15.5678	1.349
Dietary protein [%]	Cyclists (1st term)	14	15.367	14.785	12.06	19.82	13.81	17.58	2.2629	14.7258	0.6048
Dietary carbohydrates [%]	Cyclists (1st term)	14	52.211	52.03	41.557	61.09	50.94	54.95	4.93	9.4424	1.3176
saccharose [%]	Cyclists (1st term)	14	11.097	9.655	7.16	22.38	8.75	12.82	4.0085	36.1228	1.0713
dietary protein [g]	Cyclists (1st term)	14	102.219	83.295	57.67	199.63	76.75	121.069	45.0356	44.0579	12.0363
dietary fat [g]	Cyclists (1st term)	14	95.801	83.6	49.69	183.484	67.14	132.13	40.6171	42.3972	10.8554
Dietary cholesterol [mg]	Cyclists (1st term)	14	460.697	382.21	190.75	1140.02	291.38	549.64	260.58	56.5622	69.643
Saturated fatty acids [g]	Cyclists (1st term)	14	27.292	24.215	14.63	51.28	18.35	34.052	10.5211	38.5504	2.8119
monounsaturated fatty acids [g]	Cyclists (1st term)	14	30.195	26.35	15.68	55.59	20.89	36.12	13.4123	44.4181	3.5846
poliunsaturated fatty acids [g]	Cyclists (1st term)	14	14.615	11.63	7.55	22.6	10.2	21.77	5.8258	39.8629	1.557
omega-3 fatty acids [g]	Cyclists (1st term)	14	1.863	1.615	0.6	3.903	1.37	2.16	0.9476	50.8718	0.2533
omega-6 fatty acids [g]	Cyclists (1st term)	14	12.471	9.865	6.93	20.15	8.07	17.64	5.0227	40.2737	1.3424
Dietary carbohydrates [g]	Cyclists (1st term)	14	344.053	320.39	212.21	617.62	284.12	393.617	103.376	30.0465	27.6283
Dietary Fibre [g]	Cyclists (1st term)	14	26.839	24.51	13.62	67.25	17.05	32.032	13.9127	51.8372	3.7183
Dietary Starch [g]	Cyclists (1st term)	14	160.6	158.125	85.38	251.83	131.05	188.74	48.6442	30.289	13.0007
Dietary lactose [g]	Cyclists (1st term)	14	8.417	6.825	0.56	28.43	2.71	11.81	7.9966	95.0022	2.1372
Saccharose [g]	Cyclists (1st term)	14	69.266	65.149	33.04	115.61	53.03	86.479	22.6481	32.6971	6.0529
IL-4	Cyclists (1st term)	9	1.7	0.999	0.605	6.924	0.785	1.457	1.9939	117.272	0.6646
IL-12	Cyclists (1st term)	14	12.578	12.43	11.11	14.97	11.64	13.19	1.1407	9.0691	0.3049
TNF-alfa	Cyclists (1st term)	13	21.08	19.465	9.145	34.58	14.97	22.9	8.4681	40.1719	2.3486
VO2 [ml/kg/min]	Cyclists (1st term)	14	56.1	57.2	45.9	64.8	51.3	60.5	6.0285	10.746	1.6112
Maximum HR[bpm]	Cyclists (1st term)	14	184.429	181.5	172	201	179	187	7.978	4.3258	2.1322
Time [min]	Cyclists (1st term)	14	18.856	19	16.5	22	17.66	20	1.6933	8.9804	0.4526
Maximum Load [W]	Cyclists (1st term)	14	370	370	330	430	350	390	32.3443	8.7417	8.6444
HR [bpm]	Cyclists (1st term)	14	172.143	163.5	144	290	159	172	35.6497	20.7094	9.5278
Load [W]	Cyclists (1st term)	14	247.571	250	139	330	230	270	49.5576	20.0175	13.2448
Bifidocacterium spp.	Cyclists (1st term)	14	6.907	6.95	5.48	7.9	6.48	7.48	0.7015	10.1561	0.1875
Bacteroides spp.	Cyclists (1st term)	14	8.794	8.85	8	9.3	8.48	9	0.3924	4.4624	0.1049
F.prausnitzii	Cyclists (1st term)	14	8.194	8.3	7.3	8.78	7.95	8.6	0.4529	5.5277	0.121
A.muciniphila	Cyclists (1st term)	11	5.951	6.3	3.48	7.3	5.95	6.7	1.1798	19.8255	0.3557
Age [years]	Cyclists (2nd term)	14	32.643	36	20	44	24	38	7.5509	23.1319	2.0181
Body height [cm]	Cyclists (2nd term)	14	183.571	183.5	170	200	178	187	7.7232	4.2072	2.0641
Weight [kg]	Cyclists (2nd term)	14	78.536	75.35	64.3	92	72.2	90.2	9.1787	11.6873	2.4531
Fat [%]	Cyclists (2nd term)	14	14.786	13.6	8	25	12.2	16.3	4.4445	30.0595	1.1878
Fat mass [kg]	Cyclists (2nd term)	14	11.9	10.8	5.1	20.7	8.8	14	4.5274	38.045	1.21
FFM [kg] - fat free mass	Cyclists (2nd term)	14	67.036	65.35	58.2	83	62.2	73.3	7.0632	10.5365	1.8877
MM [kg] - muscle mass	Cyclists (2nd term)	14	64	62.15	55.3	78.9	59.1	70.7	7.0263	10.9786	1.8779
TBW - Total Body Water [kg]	Cyclists (2nd term)	14	47.529	47.2	40.8	59.9	43.7	50.2	5.4662	11.5008	1.4609
TBW%	Cyclists (2nd term)	14	56.129	57.9	43.2	65.6	52	60.5	6.4099	11.42	1.7131
Bone mass [kg]	Cyclists (2nd term)	14	3.386	3.25	2.9	4.4	3.1	3.7	0.4555	13.4533	0.1217
fecal pH	Cyclists (2nd term)	13	6.731	7	5.5	7.5	6.5	7	0.4837	7.1865	0.1342
dietary energy intake [kcal]	Cyclists (2nd term)	14	2898.87	2491.38	1876.4	5168.79	2389.72	3648.28	900.606	31.0675	240.697
Dietary Fat [%]	Cyclists (2nd term)	14	31.143	31.034	16.2	41.06	29.2	32.899	6.1655	19.7971	1.6478
Dietary protein [%]	Cyclists (2nd term)	14	17.095	16.442	14.39	23.38	15.936	17.427	2.2896	13.3934	0.6119
Dietary carbohydrates [%]	Cyclists (2nd term)	14	51.761	52.93	43.811	60.42	47.605	54.95	5.1655	9.9795	1.3805
saccharose [%]	Cyclists (2nd term)	14	7.588	6.472	3.7	15.63	5.31	9.713	3.432	45.2274	0.9172
dietary protein [g]	Cyclists (2nd term)	14	123.715	112.623	76.75	209.64	95.207	154.074	39.4369	31.8772	10.54
dietary fat [g]	Cyclists (2nd term)	14	99.787	93.034	46.02	167.73	80.51	109.605	34.5697	34.6434	9.2391
Dietary cholesterol [mg]	Cyclists (2nd term)	14	411.658	362.71	148.367	1130.77	258.25	500.03	252.279	61.2836	67.4244
Saturated fatty acids [g]	Cyclists (2nd term)	14	28.384	26.205	12.53	58.69	24.542	31.767	10.484	36.9363	2.802
monounsaturated fatty acids [g]	Cyclists (2nd term)	14	30.364	28.489	14.94	62.21	22.81	34.614	11.349	37.376	3.0331
poliunsaturated fatty acids [g]	Cyclists (2nd term)	14	15.08	13.62	8.554	26.64	10.837	19.79	5.439	36.0674	1.4536
omega-3 fatty acids [g]	Cyclists (2nd term)	14	2.552	2.231	1.26	4.003	1.66	3.51	1.0025	39.2835	0.2679
omega-6 fatty acids [g]	Cyclists (2nd term)	14	12.311	12.055	6.867	18.171	8.52	16.4	4.327	35.1478	1.1564
Dietary carbohydrates [g]	Cyclists (2nd term)	14	401.398	387.142	248.347	771.95	296.58	462.057	140.082	34.8985	37.4384
Dietary Fibre [g]	Cyclists (2nd term)	14	25.495	23.901	12.928	48.14	15.409	34.407	10.2118	40.0544	2.7292
Dietary Starch [g]	Cyclists (2nd term)	14	207.009	167.379	124.047	327.98	151.123	262.367	68.1243	32.909	18.207
Dietary lactose [g]	Cyclists (2nd term)	14	7.419	3.176	0.11	24.945	1.038	9.92	8.6623	116.761	2.3151
Saccharose [g]	Cyclists (2nd term)	14	53.781	47.76	22	97.66	37.684	75.679	24.1807	44.9611	6.4626
IL-4	Cyclists (2nd term)	14	3.933	3.807	0.925	9.011	1.96	5.579	2.2006	55.9539	0.5881
IL-12	Cyclists (2nd term)	13	13.272	12.02	10.47	19.57	11.37	14.83	2.7061	20.3891	0.7505
TNF-alfa	Cyclists (2nd term)	14	12.328	12.325	1.03	23.165	9.94	14.18	5.0582	41.0294	1.3519
VO2 [ml/kg/min]	Cyclists (2nd term)	14	51.414	51.9	41.4	58.9	48	56.3	5.6743	11.0365	1.5165
Maximum HR[bpm]	Cyclists (2nd term)	14	184.214	183	173	197	178	191	8.0017	4.3437	2.1385
Time [min]	Cyclists (2nd term)	14	17.807	17.15	15	22	17	19	1.8907	10.6174	0.5053
Maximum Load [W]	Cyclists (2nd term)	14	348.571	340	290	430	330	370	36.3439	10.4265	9.7133
HR [bpm]	Cyclists (2nd term)	14	162.571	162	148	177	156	171	8.6444	5.3173	2.3103
Load [W]	Cyclists (2nd term)	14	250	250	210	330	230	250	28.2843	11.3137	7.5593
Bifidocacterium spp.	Cyclists (2nd term)	13	7.082	7	6.3	8	6.85	7.48	0.5032	7.1056	0.1396
Bacteroides spp.	Cyclists (2nd term)	13	8.774	8.85	7.85	9.3	8.6	9	0.4004	4.5636	0.1111
F.prausnitzii	Cyclists (2nd term)	13	8.371	8.3	7.48	8.9	8.3	8.48	0.3778	4.5129	0.1048
A.muciniphila	Cyclists (2nd term)	10	6.279	6.54	3.6	7.78	5.48	7.3	1.2642	20.1334	0.3998
Age [years]	Control group	11	29.091	24	20	42	22	37	8.154	28.03	2.4586
Body height [cm]	Control group	11	181.182	182	175	188	178	185	4.143	2.2866	1.2491
Weight [kg]	Control group	11	83.336	76.6	70.7	104	72.4	99.8	13.404	16.0844	4.0415
Fat [%]	Control group	11	15.282	15.6	6	27.5	6.6	20.7	7.64	49.9932	2.3035
Fat mass [kg]	Control group	11	13.518	11.3	4.2	27.5	5	21.1	8.532	63.1127	2.5724
FFM [kg] - fat free mass	Control group	11	69.536	70.6	61.1	81	63.2	74	6.675	9.5987	2.0125
MM [kg] - muscle mass	Control group	11	66.609	67.4	58.4	77.2	60.1	70.7	6.141	9.2189	1.8515
TBW - Total Body Water [kg]	Control group	11	50.864	50.1	44.7	59.3	46.3	54.2	4.688	9.2171	1.4135
TBW%	Control group	11	61.391	61.7	50.2	68.9	55.2	68.4	6.46	10.5224	1.9477
Bone mass [kg]	Control group	11	3.218	3.2	2.7	3.8	3	3.6	0.34	10.5666	0.1025
fecal pH	Control group	11	5.955	6	5	7	5.5	6.5	0.65	10.919	0.196
dietary energy intake [kcal]	Control group	11	2500.45	2459.15	799.127	5190.27	1622.45	3232.58	1207.97	48.3101	364.216
Dietary Fat [%]	Control group	11	37.93	36.11	31.03	47.71	35.28	41.607	4.723	12.4508	1.4239
Dietary protein [%]	Control group	11	20.606	21.4	14.43	28.4	17.951	22.19	3.916	19.0033	1.1807
Dietary carbohydrates [%]	Control group	11	41.92	42.5	30.1	54.54	36.877	45.79	6.638	15.836	2.0016
saccharose [%]	Control group	11	5.667	3.65	0.91	29	2.25	4.944	7.958	140.423	2.3995
dietary protein [g]	Control group	11	125.292	160.28	42.9867	187.28	75.875	172.91	53.364	42.592	16.0899
dietary fat [g]	Control group	11	102.983	99.95	36.9433	178.94	64.042	129.68	44.27	42.9883	13.3481
Dietary cholesterol [mg]	Control group	11	543.187	417.94	180.3	1097.8	281.65	943	334.834	61.6425	100.956
Saturated fatty acids [g]	Control group	11	31.301	29.73	10.7571	55.62	18.37	39.8	15.607	49.86	4.7057
monounsaturated fatty acids [g]	Control group	11	34.072	33.53	12.0419	52.24	20.691	46.56	13.398	39.3235	4.0397
poliunsaturated fatty acids [g]	Control group	11	15.188	15.75	4.5429	34.36	7.581	19.063	8.449	55.6261	2.5474
omega-3 fatty acids [g]	Control group	11	1.924	1.72	0.5101	4.95	1.01	2.294	1.241	64.5206	0.3743
omega-6 fatty acids [g]	Control group	11	9.146	11.13	4.0126	14.14	4.471	11.69	3.635	39.739	1.0959
Dietary carbohydrates [g]	Control group	11	290.17	241.99	84.774	735.1	200.846	384.15	175.934	60.6315	53.0462
Dietary Fibre [g]	Control group	11	25.554	22.93	8.7183	41.72	12.152	35.28	12.548	49.1053	3.7835
Dietary Starch [g]	Control group	11	133.487	128.28	45.71	219.42	88.142	178.96	54.583	40.8904	16.4575
Dietary lactose [g]	Control group	11	5.592	5.427	0	15.13	1.013	8.58	4.366	78.0747	1.3163
Saccharose [g]	Control group	11	53.245	25.193	3.3783	384.3	5.18	28.96	110.869	208.225	33.4283
IL-4	Control group	10	4.999	4.475	0.9573	9.348	2.432	7.999	3.032	60.6531	0.9588
IL-12	Control group	10	11.76	10.905	10.47	17.77	10.68	11.53	2.218	18.8601	0.7014
TNF-alfa	Control group	8	13.981	14.865	7.815	16.53	12.855	16.03	2.859	20.448	1.0107
VO2 [ml/kg/min]	Control group	11	39.727	42.9	27.6	50	34.3	45.4	7.693	19.3655	2.3196
Maximum HR[bpm]	Control group	11	183.818	186	163	197	177	195	11.339	6.1684	3.4187
Time [min]	Control group	11	13.477	14	10.75	16	12	14	1.606	11.9197	0.4844
Maximum Load [W]	Control group	11	260.909	270	210	310	230	270	31.45	12.0539	9.4825
HR [bpm]	Control group	11	146.909	146	123	164	139	159	12.926	8.7989	3.8974
Load [W]	Control group	11	157.273	150	110	210	150	170	27.236	17.3179	8.2121
Bifidocacterium spp.	Control group	11	6.944	7	5.9	7.9	6.3	7.6	0.692	9.9626	0.2086
Bacteroides spp.	Control group	11	8.876	9	7.7	9.48	8.3	9.3	0.616	6.9366	0.1856
F.prausnitzii	Control group	11	7.769	7.85	6.95	8.9	7.3	8.3	0.597	7.6899	0.1801
A.muciniphila	Control group	7	6.401	6.85	4.7	7.48	5	7.3	1.11	17.343	0.4196

## Sheet: Normality
Both groups at baseline
	normality tests
Variable	N	W	p
Age [years]	25	0.889948	0.011157
Body height [cm]	25	0.951799	0.275148
Weight [kg]	25	0.867731	0.003897
Fat [%]	25	0.957957	0.375294
Fat mass [kg]	25	0.906614	0.025631
FFM [kg] - fat free mass	25	0.949859	0.248894
MM [kg] - muscle mass	25	0.954366	0.313695
TBW - Total Body Water [kg]	25	0.943671	0.179871
TBW%	25	0.896646	0.015518
Bone mass [kg]	25	0.924207	0.063931
fecal pH	25	0.928303	0.079417
dietary energy intake [kcal]	25	0.95084	0.261876
Dietary Fat [%]	25	0.957875	0.373772
Dietary protein [%]	25	0.922686	0.059003
Dietary carbohydrates [%]	25	0.974449	0.758105
saccharose [%]	25	0.870607	0.004449
dietary protein [g]	25	0.875893	0.005692
dietary fat [g]	25	0.948887	0.236623
Dietary cholesterol [mg]	25	0.861632	0.002952
Saturated fatty acids [g]	25	0.934714	0.111706
monounsaturated fatty acids [g]	25	0.93832	0.135367
poliunsaturated fatty acids [g]	25	0.935172	0.114466
omega-3 fatty acids [g]	25	0.879752	0.00683
omega-6 fatty acids [g]	25	0.9465	0.208819
Dietary carbohydrates [g]	25	0.90346	0.021839
Dietary Fibre [g]	25	0.903903	0.022333
Dietary Starch [g]	25	0.983564	0.945436
Dietary lactose [g]	25	0.845687	0.00146
Saccharose [g]	25	0.598451	0
IL-4	19	0.826747	0.002873
IL-12	24	0.84657	0.001889
TNF-alfa	21	0.869797	0.009499
VO2 [ml/kg/min]	25	0.95111	0.265551
Maximum HR[bpm]	25	0.970108	0.647803
Time [min]	25	0.962896	0.475117
Maximum Load [W]	25	0.951683	0.273516
HR [bpm]	25	0.646762	2e-06
Load [W]	25	0.935443	0.116128
Bifidocacterium spp.	25	0.954792	0.320516
Bacteroides spp.	25	0.928285	0.07934
F.prausnitzii	25	0.962745	0.471805
A.muciniphila	18	0.889274	0.037503
Groups aggregated
	Aggregated data (normality tests)
Zmienna
	kod	N	W	p
Age [years]	Cyclists (1st term)	14	0.905958	0.137654
Body height [cm]	Cyclists (1st term)	14	0.9597	0.718153
Weight [kg]	Cyclists (1st term)	14	0.90013	0.113276
Fat [%]	Cyclists (1st term)	14	0.965705	0.814608
Fat mass [kg]	Cyclists (1st term)	14	0.936261	0.37252
FFM [kg] - fat free mass	Cyclists (1st term)	14	0.921601	0.231858
MM [kg] - muscle mass	Cyclists (1st term)	14	0.919004	0.21275
TBW - Total Body Water [kg]	Cyclists (1st term)	14	0.920429	0.223042
TBW%	Cyclists (1st term)	14	0.780386	0.002884
Bone mass [kg]	Cyclists (1st term)	14	0.874131	0.047976
fecal pH	Cyclists (1st term)	14	0.903273	0.125828
dietary energy intake [kcal]	Cyclists (1st term)	14	0.87913	0.056482
Dietary Fat [%]	Cyclists (1st term)	14	0.928784	0.293372
Dietary protein [%]	Cyclists (1st term)	14	0.918167	0.206923
Dietary carbohydrates [%]	Cyclists (1st term)	14	0.966907	0.832797
saccharose [%]	Cyclists (1st term)	14	0.811877	0.007026
dietary protein [g]	Cyclists (1st term)	14	0.801909	0.00527
dietary fat [g]	Cyclists (1st term)	14	0.891609	0.085267
Dietary cholesterol [mg]	Cyclists (1st term)	14	0.858345	0.028887
Saturated fatty acids [g]	Cyclists (1st term)	14	0.913513	0.177214
monounsaturated fatty acids [g]	Cyclists (1st term)	14	0.865077	0.035808
poliunsaturated fatty acids [g]	Cyclists (1st term)	14	0.836021	0.014425
omega-3 fatty acids [g]	Cyclists (1st term)	14	0.880634	0.059338
omega-6 fatty acids [g]	Cyclists (1st term)	14	0.841501	0.017062
Dietary carbohydrates [g]	Cyclists (1st term)	14	0.869621	0.041449
Dietary Fibre [g]	Cyclists (1st term)	14	0.799292	0.004891
Dietary Starch [g]	Cyclists (1st term)	14	0.966075	0.820266
Dietary lactose [g]	Cyclists (1st term)	14	0.8523	0.02387
Saccharose [g]	Cyclists (1st term)	14	0.974295	0.928209
IL-4	Cyclists (1st term)	9	0.561556	3.4e-05
IL-12	Cyclists (1st term)	14	0.938931	0.404796
TNF-alfa	Cyclists (1st term)	13	0.897889	0.125101
VO2 [ml/kg/min]	Cyclists (1st term)	14	0.944376	0.477236
Maximum HR[bpm]	Cyclists (1st term)	14	0.922161	0.236185
Time [min]	Cyclists (1st term)	14	0.957239	0.67748
Maximum Load [W]	Cyclists (1st term)	14	0.928028	0.286251
HR [bpm]	Cyclists (1st term)	14	0.576707	2.5e-05
Load [W]	Cyclists (1st term)	14	0.925676	0.26511
Bifidocacterium spp.	Cyclists (1st term)	14	0.969947	0.875947
Bacteroides spp.	Cyclists (1st term)	14	0.948003	0.530161
F.prausnitzii	Cyclists (1st term)	14	0.943813	0.469349
A.muciniphila	Cyclists (1st term)	11	0.830587	0.023764
Age [years]	Control group	11	0.868094	0.073266
Body height [cm]	Control group	11	0.95761	0.741555
Weight [kg]	Control group	11	0.804446	0.010764
Fat [%]	Control group	11	0.918677	0.307773
Fat mass [kg]	Control group	11	0.900325	0.18655
FFM [kg] - fat free mass	Control group	11	0.931744	0.428767
MM [kg] - muscle mass	Control group	11	0.950547	0.650953
TBW - Total Body Water [kg]	Control group	11	0.951226	0.659659
TBW%	Control group	11	0.924309	0.356176
Bone mass [kg]	Control group	11	0.957907	0.745336
fecal pH	Control group	11	0.9336	0.448406
dietary energy intake [kcal]	Control group	11	0.94177	0.541523
Dietary Fat [%]	Control group	11	0.889711	0.137919
Dietary protein [%]	Control group	11	0.945639	0.588861
Dietary carbohydrates [%]	Control group	11	0.984364	0.985551
saccharose [%]	Control group	11	0.557198	8e-06
dietary protein [g]	Control group	11	0.860611	0.058642
dietary fat [g]	Control group	11	0.967822	0.863733
Dietary cholesterol [mg]	Control group	11	0.862957	0.062892
Saturated fatty acids [g]	Control group	11	0.934713	0.460475
monounsaturated fatty acids [g]	Control group	11	0.942854	0.554606
poliunsaturated fatty acids [g]	Control group	11	0.904251	0.208183
omega-3 fatty acids [g]	Control group	11	0.865412	0.067658
omega-6 fatty acids [g]	Control group	11	0.866481	0.06984
Dietary carbohydrates [g]	Control group	11	0.853566	0.047499
Dietary Fibre [g]	Control group	11	0.890939	0.142873
Dietary Starch [g]	Control group	11	0.962685	0.804685
Dietary lactose [g]	Control group	11	0.92878	0.398644
Saccharose [g]	Control group	11	0.464903	1e-06
IL-4	Control group	10	0.931553	0.46334
IL-12	Control group	10	0.61122	7.5e-05
TNF-alfa	Control group	8	0.82968	0.058914
VO2 [ml/kg/min]	Control group	11	0.905738	0.216947
Maximum HR[bpm]	Control group	11	0.931322	0.424382
Time [min]	Control group	11	0.888995	0.135104
Maximum Load [W]	Control group	11	0.847623	0.039734
HR [bpm]	Control group	11	0.952628	0.677669
Load [W]	Control group	11	0.934907	0.462588
Bifidocacterium spp.	Control group	11	0.917931	0.301782
Bacteroides spp.	Control group	11	0.86313	0.063216
F.prausnitzii	Control group	11	0.9618	0.793936
A.muciniphila	Control group	7	0.846872	0.115042
Age [years]	Cyclists (2nd term)	14	0.901588	0.118931
Body height [cm]	Cyclists (2nd term)	14	0.960218	0.726683
Weight [kg]	Cyclists (2nd term)	14	0.880136	0.058375
Fat [%]	Cyclists (2nd term)	14	0.927736	0.283551
Fat mass [kg]	Cyclists (2nd term)	14	0.910319	0.159278
FFM [kg] - fat free mass	Cyclists (2nd term)	14	0.908359	0.149171
MM [kg] - muscle mass	Cyclists (2nd term)	14	0.903113	0.125154
TBW - Total Body Water [kg]	Cyclists (2nd term)	14	0.923259	0.244888
TBW%	Cyclists (2nd term)	14	0.953713	0.61969
Bone mass [kg]	Cyclists (2nd term)	14	0.885141	0.068825
fecal pH	Cyclists (2nd term)	13	0.829253	0.015502
dietary energy intake [kcal]	Cyclists (2nd term)	14	0.84053	0.01656
Dietary Fat [%]	Cyclists (2nd term)	14	0.918006	0.205817
Dietary protein [%]	Cyclists (2nd term)	14	0.824842	0.010297
Dietary carbohydrates [%]	Cyclists (2nd term)	14	0.95034	0.565991
saccharose [%]	Cyclists (2nd term)	14	0.883004	0.064144
dietary protein [g]	Cyclists (2nd term)	14	0.923475	0.246638
dietary fat [g]	Cyclists (2nd term)	14	0.93938	0.41044
Dietary cholesterol [mg]	Cyclists (2nd term)	14	0.827321	0.011089
Saturated fatty acids [g]	Cyclists (2nd term)	14	0.829964	0.012006
monounsaturated fatty acids [g]	Cyclists (2nd term)	14	0.858261	0.02881
poliunsaturated fatty acids [g]	Cyclists (2nd term)	14	0.92426	0.253081
omega-3 fatty acids [g]	Cyclists (2nd term)	14	0.885935	0.070656
omega-6 fatty acids [g]	Cyclists (2nd term)	14	0.865225	0.035979
Dietary carbohydrates [g]	Cyclists (2nd term)	14	0.872017	0.044793
Dietary Fibre [g]	Cyclists (2nd term)	14	0.924546	0.255475
Dietary Starch [g]	Cyclists (2nd term)	14	0.860921	0.031352
Dietary lactose [g]	Cyclists (2nd term)	14	0.787023	0.003465
Saccharose [g]	Cyclists (2nd term)	14	0.941135	0.433068
IL-4	Cyclists (2nd term)	14	0.942027	0.444908
IL-12	Cyclists (2nd term)	13	0.849077	0.02773
TNF-alfa	Cyclists (2nd term)	14	0.954897	0.638961
VO2 [ml/kg/min]	Cyclists (2nd term)	14	0.942419	0.450194
Maximum HR[bpm]	Cyclists (2nd term)	14	0.947866	0.528088
Time [min]	Cyclists (2nd term)	14	0.935552	0.364308
Maximum Load [W]	Cyclists (2nd term)	14	0.930901	0.314136
HR [bpm]	Cyclists (2nd term)	14	0.962635	0.766151
Load [W]	Cyclists (2nd term)	14	0.817284	0.008231
Bifidocacterium spp.	Cyclists (2nd term)	13	0.968017	0.869545
Bacteroides spp.	Cyclists (2nd term)	13	0.933143	0.374401
F.prausnitzii	Cyclists (2nd term)	13	0.878309	0.067652
A.muciniphila	Cyclists (2nd term)	10	0.915872	0.32381

## Sheet: Tables
variable	p_both_groups	p_control_group	p_cyclists(1st_term)	p_cyclists(2nd_term)
Age [years]	0.011157	0.073266	0.137654	0.118931	4	49
Body height [cm]	0.275148	0.741555	0.718153	0.726683	5	50
Weight [kg]	0.003897	0.010764	0.113276	0.058375	6	51
Fat [%]	0.375294	0.307773	0.814608	0.283551	7	52
Fat mass [kg]	0.025631	0.18655	0.37252	0.159278	8	53
FFM [kg] - fat free mass	0.248894	0.428767	0.231858	0.149171	9	54
MM [kg] - muscle mass	0.313695	0.650953	0.21275	0.125154	10	55
TBW - Total Body Water [kg]	0.179871	0.659659	0.223042	0.244888	11	56
TBW%	0.015518	0.356176	0.002884	0.61969	12	57
Bone mass [kg]	0.063931	0.745336	0.047976	0.068825	13	58
fecal pH	0.079417	0.448406	0.125828	0.015502	18	63
dietary energy intake [kcal]	0.261876	0.541523	0.056482	0.01656	19	64
Dietary Fat [%]	0.373772	0.137919	0.293372	0.205817	20	65
Dietary protein [%]	0.059003	0.588861	0.206923	0.010297	21	66
Dietary carbohydrates [%]	0.758105	0.985551	0.832797	0.565991	22	67
saccharose [%]	0.004449	8e-06	0.007026	0.064144	23	68
dietary protein [g]	0.005692	0.058642	0.00527	0.246638	24	69
dietary fat [g]	0.236623	0.863733	0.085267	0.41044	25	70
Dietary cholesterol [mg]	0.002952	0.062892	0.028887	0.011089	26	71
Saturated fatty acids [g]	0.111706	0.460475	0.177214	0.012006	27	72
monounsaturated fatty acids [g]	0.135367	0.554606	0.035808	0.02881	28	73
poliunsaturated fatty acids [g]	0.114466	0.208183	0.014425	0.253081	29	74
omega-3 fatty acids [g]	0.00683	0.067658	0.059338	0.070656	30	75
omega-6 fatty acids [g]	0.208819	0.06984	0.017062	0.035979	31	76
Dietary carbohydrates [g]	0.021839	0.047499	0.041449	0.044793	32	77
Dietary Fibre [g]	0.022333	0.142873	0.004891	0.255475	33	78
Dietary Starch [g]	0.945436	0.804685	0.820266	0.031352	34	79
Dietary lactose [g]	0.00146	0.398644	0.02387	0.003465	35	80
Saccharose [g]	0	1e-06	0.928209	0.433068	36	81
IL-4	0.002873	0.46334	3.4e-05	0.444908	37	82
IL-12	0.001889	7.5e-05	0.404796	0.02773	38	83
TNF-alfa	0.009499	0.058914	0.125101	0.638961	39	84
VO2 [ml/kg/min]	0.265551	0.216947	0.477236	0.450194	40	85
Maximum HR[bpm]	0.647803	0.424382	0.236185	0.528088	41	86
Time [min]	0.475117	0.135104	0.67748	0.364308	42	87
Maximum Load [W]	0.273516	0.039734	0.286251	0.314136	43	88
HR [bpm]	2e-06	0.677669	2.5e-05	0.766151	44	89
Load [W]	0.116128	0.462588	0.26511	0.008231	45	90
Bifidocacterium spp.	0.320516	0.301782	0.875947	0.869545	91	95
Bacteroides spp.	0.07934	0.063216	0.530161	0.374401	92	96
F.prausnitzii	0.471805	0.793936	0.469349	0.067652	93	97
A.muciniphila	0.037503	0.115042	0.023764	0.32381	94	98
