# Supplementary material for: No changes in the abundance of selected fecal bacteria during increased carbohydrates consumption period associated with the racing season in amateur road cyclists
Source: PeerJ. 2023 Jan 20;11:e14594. doi: 10.7717/peerj.14594 (PMC9869777; doi:10.7717/peerj.14594)
Supplement: Supplemental Information 3 — E.g. t-test, U-Mann-Whitney, Wilcoxon [file peerj-11-14594-s003.xlsx]

## Sheet: Basic statistics
Both groups
Variable	Group size	Mean	Confidence	Confidence	Median	Minimum	Maximum	Upper quartile	Lower quartile	Standard deviation	Coefficient of variation	Standard error
			-0.95	0.95
Protein [g/kg b.m]	27	1.51871	1.21357	1.82385	1.2325	0.421025	3.48618	0.970405	2.25731	0.77136	50.7906	0.148448
Fat [g/kg b.m.]	27	1.31243	1.07614	1.54873	1.24733	0.361835	2.79904	0.924793	1.69295	0.597338	45.5138	0.114958
Carbohydrates [g/kg b.m.]	27	4.21431	3.3855	5.04312	4.18136	0.830304	9.42436	2.60765	4.91499	2.09515	49.7152	0.403212
Between groups
Variable
	Group name	Group size	Mean	Confidence	Confidence	Median	Minimum	Maximum	Upper quartile	Lower quartile	Standard deviation	Coefficient of variation	Standard error
				-0.95	0.95
Protein [g/kg b.m]	Cyclists (1st term)	14	1.3237	0.966093	1.6813	1.11348	0.606414	2.86413	1.05118	1.36185	0.619353	46.7897	0.165529
Fat [g/kg b.m.]	Cyclists (1st term)	14	1.23794	0.94197	1.53391	1.14367	0.54816	2.25165	0.924793	1.37495	0.512603	41.4078	0.136999
Carbohydrates [g/kg b.m.]	Cyclists (1st term)	14	4.48341	3.57981	5.38701	4.3361	2.35789	8.86112	3.89285	4.49269	1.56499	34.9062	0.418261
Protein [g/kg b.m]	Cyclists (2nd term)	14	1.5783	1.28788	1.86872	1.4264	1.0247	2.88363	1.26196	1.87296	0.502994	31.8694	0.134431
Fat [g/kg b.m.]	Cyclists (2nd term)	14	1.27006	1.02888	1.51124	1.23794	0.607124	2.30715	0.937254	1.49134	0.417714	32.8892	0.111639
Carbohydrates [g/kg b.m.]	Cyclists (2nd term)	14	5.1816	4.03007	6.33314	4.91498	3.25488	10.6183	3.79695	5.49894	1.99441	38.4901	0.533028
Protein [g/kg b.m]	Control group	13	1.72872	1.19452	2.26291	1.76121	0.421025	3.48618	0.916433	2.25927	0.883996	51.136	0.245176
Fat [g/kg b.m.]	Control group	13	1.39266	0.976184	1.80914	1.38053	0.361835	2.79904	0.999983	1.69295	0.689194	49.4876	0.191148
Carbohydrates [g/kg b.m.]	Control group	13	3.92451	2.36241	5.4866	3.34115	0.830304	9.42436	2.05108	5.01501	2.58499	65.8678	0.716946

## Sheet: Normality test
	aggregated normality tests
Variable
	Group name	N	W	p
Protein [g/kg b.m]	Cyclists (1st term)	14	0.79823	0.004746
Fat [g/kg b.m.]	Cyclists (1st term)	14	0.932427	0.329899
Carbohydrates [g/kg b.m.]	Cyclists (1st term)	14	0.823135	0.009786
Protein [g/kg b.m]	Cyclists (2nd term)	14	0.878827	0.055924
Fat [g/kg b.m.]	Cyclists (2nd term)	14	0.937138	0.382887
Carbohydrates [g/kg b.m.]	Cyclists (2nd term)	14	0.827659	0.011202
Protein [g/kg b.m]	Control group	13	0.947804	0.565423
Fat [g/kg b.m.]	Control group	13	0.969678	0.890414
Carbohydrates [g/kg b.m.]	Control group	13	0.898456	0.12736

## Sheet: Groups comparison
	t-tests
Variable	Group 1: Cyclists (1st term)
	Group 2: Control group
	Mean	Mean	t	df	p	t oddz.	df	p	N	N	STD	STD	quotient F	p	Levene's	df	p
	Cyclists (1st term)	Control group				estimated variation		double-tailed	Cyclists (1st term)	Control group	Cyclists (1st term)	Control group	variances	variances	F(1,df)	Levene's	Levene's
Fat [g/kg b.m.]	1.23794	1.39266	-0.665242	25	0.511987	-0.657908	22.1095	0.517389	14	13	0.512603	0.689194	1.80768	0.303279	0.828378	25	0.371434
	U Mann-Whitney with continuity correction
Variable
	Sum of ranks	Sum of ranks	U	Z	p	Z	p	N	N	2*1tailed
	Cyclists (1st term)	Control group				corrected		Cyclists (1st term)	Control group	Exact sig.
Protein [g/kg b.m]	175	203	70	-0.994786	0.319841	-0.994786	0.319841	14	13	0.325477
Carbohydrates [g/kg b.m.]	223	155	64	1.28594	0.198464	1.28594	0.198464	14	13	0.202012

## Sheet: Cyclists 1st and 2nd term comp
	paired samples t test
Variable
	Mean	STD	N	Difference	STD	t	df	p	Confidence	Confidence
					difference				-0.95	0.95
Fat [g/kg b.m.]	1.23794	0.512603
Fat [g/kg b.m.] 2nd term	1.27006	0.417714	14	-0.032124	0.298156	-0.403129	13	0.693405	-0.204274	0.140026
	wilcoxon matched pairs test
Paired variable
	N	T	Z	p
	Ważnych
Protein [g/kg b.m] 1st & 2nd term	14	14	2.41689	0.015654
	Sign test
Paired variable
	N	Percent	Z	p
		v < V
Protein [g/kg b.m] 1st & 2nd term	14	78.5714	1.87083	0.061369
	wilcoxon matched pairs test
Paired variable
	N	T	Z	p
Carbohydrates [g/kg b.m.] 1st & 2nd term	14	19	2.10301	0.035465
	Sign test
Paired variable
	N	Percent	Z	p
		v < V
Carbohydrates [g/kg b.m.] 1st & 2nd term	14	64.2857	0.801784	0.422678
