# Supplementary material for: No changes in the abundance of selected fecal bacteria during increased carbohydrates consumption period associated with the racing season in amateur road cyclists
Source: PeerJ. 2023 Jan 20;11:e14594. doi: 10.7717/peerj.14594 (PMC9869777; doi:10.7717/peerj.14594)
Supplement: Supplemental Information 4 — E.g. correlations [file peerj-11-14594-s004.xlsx]

## Sheet: Groups comparison
Normal distribution
	t-tests;
Variable	Group 1: Cyclists (1st term)
	Group 2: Controls
	Mean	Mean	t	df	p	t	df	p	N	N	STD	STD	quotient F	p	Levene's	df	p
	Cyclists (1st term)	Control group				est. Variation		double-tailed	Cyclists (1st term)	Control group	Cyclists (1st term)	Control group	Variation	Variation	F(1,df)	Levene's	Levene's
Age [years]	32	29.091	0.92846	23	0.362812	0.91839	20.6393	0.369022	14	11	7.473	8.154	1.19061	0.753508	0.481492	23	0.494696
Body height [cm]	183.643	181.182	0.95099	23	0.351499	1.01919	20.6513	0.319903	14	11	7.7321	4.143	3.48328	0.054949	2.49337	23	0.127982
Fat [%]	12.671	15.282	-1.01731	23	0.319587	-0.97117	16.8447	0.345202	14	11	5.1826	7.64	2.1731	0.190688	2.49788	23	0.127655
Fat mass [kg]	10.136	13.518	-1.24421	23	0.225955	-1.16907	15.1831	0.260402	14	11	4.9553	8.532	2.96438	0.069842	5.16295	23	0.032739
FFM [kg] - fat free mass	68.257	69.536	-0.4102	23	0.685454	-0.42237	22.9958	0.676678	14	11	8.4687	6.675	1.60985	0.455883	0.281778	23	0.600627
MM [kg] - muscle mass	65.064	66.609	-0.52852	23	0.602203	-0.54594	22.9959	0.590364	14	11	8.0065	6.141	1.70006	0.405326	0.392631	23	0.53709
TBW - Total Body Water [kg]	51.307	50.864	0.18865	23	0.85202	0.19653	22.8325	0.845937	14	11	6.5823	4.688	1.97133	0.287072	1.44161	23	0.242099
fecal pH	6.429	5.955	1.9757	23	0.060305	1.93496	19.6258	0.06754	14	11	0.5497	0.65	1.39884	0.56127	0.695918	23	0.41274
dietary energy intake [kcal]	2612.12	2500.45	0.26845	23	0.790747	0.25811	17.6231	0.79931	14	11	873.899	1207.97	1.91068	0.272686	0.445262	23	0.511233
Dietary Fat [%]	32.423	37.93	-2.78463	23	0.010535	-2.80788	22.2307	0.010187	14	11	5.0475	4.723	1.14232	0.847756	0.001364	23	0.970854
Dietary protein [%]	15.367	20.606	-4.20508	23	0.000338	-3.94926	15.1349	0.001265	14	11	2.2629	3.916	2.99437	0.067384	2.04494	23	0.166158
Dietary carbohydrates [%]	52.211	41.92	4.453	23	0.000182	4.2944	17.9513	0.000439	14	11	4.93	6.638	1.81322	0.312252	1.08752	23	0.307859
dietary fat [g]	95.801	102.983	-0.42191	23	0.67701	-0.41739	20.6527	0.6807	14	11	40.6171	44.27	1.18798	0.756283	0.021909	23	0.883619
Saturated fatty acids [g]	27.292	31.301	-0.76672	23	0.451047	-0.73145	16.7715	0.474602	14	11	10.5211	15.607	2.20045	0.183834	2.31411	23	0.141835
omega-3 fatty acids [g]	1.863	1.924	-0.13964	23	0.890159	-0.1351	18.3033	0.894007	14	11	0.9476	1.241	1.71575	0.358	0.418143	23	0.524266
Dietary Starch [g]	160.6	133.487	1.31149	23	0.202633	1.29278	20.2953	0.210611	14	11	48.6442	54.583	1.25909	0.684324	0.263507	23	0.612617
TNF-alfa	21.08	13.981	2.27315	19	0.034813	2.77643	15.9203	0.013528	13	8	8.4681	2.859	8.7744	0.008074	4.8626	19	0.039965
VO2 [ml/kg/min]	56.1	39.727	5.97358	23	4e-06	5.79709	18.6393	1.5e-05	14	11	6.0285	7.693	1.6286	0.404892	1.48967	23	0.234634
HR [bpm]	184.429	183.818	0.15805	23	0.875794	0.15149	17.2814	0.88134	14	11	7.978	11.339	2.01991	0.234651	1.69572	23	0.20574
Time [min]	18.856	13.477	8.06042	23	0	8.11368	22.1158	0	14	11	1.6933	1.606	1.11108	0.883413	0.189195	23	0.667642
Load [W]	247.571	157.273	5.41861	23	1.7e-05	5.79429	20.9008	1e-05	14	11	49.5576	27.236	3.31073	0.064928	1.72546	23	0.201945
Bifidocacterium spp._log	6.907	6.944	-0.1299	23	0.897778	-0.13012	21.7603	0.897664	14	11	0.7015	0.692	1.02832	0.984249	0.162797	23	0.690321
Bacteroides spp._log	8.794	8.876	-0.40945	23	0.685998	-0.3883	16.1368	0.702872	14	11	0.3924	0.616	2.46207	0.130388	2.72058	23	0.112655
F.prausnitzii_log	8.194	7.769	2.02329	23	0.054815	1.95589	18.2135	0.065994	14	11	0.4529	0.597	1.73999	0.345995	0.905445	23	0.351219
Non-parametric
	U Mann-Whitney with continuity correction
Variable
	Sum of ranks	Sum of ranks	U	Z	p	Z	p	N	N	2*1tailed
	Cyclists (1st term)	Control group				corrected		Cyclists (1st term)	Control group	Exact sig.
Weight [kg]	162.5	162.5	57.5	-1.04015	0.29827	-1.04035	0.298177	14	11	0.291478
TBW%	200	125	59	0.95804	0.338046	0.9584	0.33786	14	11	0.344454
Bone mass [kg]	173	152	68	-0.46533	0.641694	-0.46777	0.639952	14	11	0.647494
saccharose [%]	243	82	16	3.31207	0.000926	3.31334	0.000922	14	11	0.000398
dietary protein [g]	166	159	61	-0.84855	0.396135	-0.84871	0.396044	14	11	0.402961
Dietary cholesterol [mg]	176	149	71	-0.3011	0.763341	-0.30115	0.763297	14	11	0.767498
monounsaturated fatty acids [g]	169	156	64	-0.68431	0.493779	-0.68444	0.493696	14	11	0.500669
poliunsaturated fatty acids [g]	189	136	70	0.35584	0.721959	0.35591	0.721908	14	11	0.726735
omega-6 fatty acids [g]	205	120	54	1.23176	0.21804	1.232	0.217951	14	11	0.222452
Dietary carbohydrates [g]	211	114	48	1.56023	0.118707	1.56053	0.118636	14	11	0.12007
Dietary Fibre [g]	186	139	73	0.19161	0.84805	0.19164	0.848021	14	11	0.850813
Dietary lactose [g]	198	127	61	0.84855	0.396135	0.84871	0.396044	14	11	0.402961
Saccharose [g]	240	85	19	3.14783	0.001645	3.14844	0.001642	14	11	0.000871
IL-4	57	133	12	-2.65361	0.007964	-2.65361	0.007964	9	10	0.005672
IL-12	217.5	82.5	27.5	2.45927	0.013923	2.46034	0.013881	14	10	0.010735
Maximum Load [W]	259	66	0	4.18798	2.8e-05	4.22884	2.3e-05	14	11	0
Maximum HR[bpm]	236.5	88.5	22.5	2.95622	0.003115	2.96193	0.003057	14	11	0.001779
A.muciniphila_log	91.5	79.5	25.5	-1.13208	0.2576	-1.13502	0.25637	11	7	0.246292

## Sheet: Cyclists 1st and 2nd term comp
	paired samples t test
	Mean	STD	N	Difference	STD	t	df	p	Confidence	Confidence
					difference				-0.95	0.95
Age [years]	32	7.47303
Age [years]	32.6429	7.55093	14	-0.642857	0.633324	-3.79798	13	0.002216	-1.00853	-0.277187
	paired samples t test
Variable
	Mean	STD	N	Difference	STD	t	df	p	Confidence	Confidence
					difference				-0.95	0.95
Body height [cm]	183.643	7.73212
Body height [cm]	183.571	7.72323	14	0.071429	0.267261	1	13	0.335561	-0.082883	0.225741
	paired samples t test
Variable
	Mean	STD	N	Difference	STD	t	df	p	Confidence	Confidence
					difference				-0.95	0.95
Weight [kg]	78.3643	10.4977
Weight [kg]	78.5357	9.17871	14	-0.171429	2.98004	-0.215241	13	0.83292	-1.89205	1.5492
	paired samples t test
Variable
	Mean	STD	N	Difference	STD	t	df	p	Confidence	Confidence
					difference				-0.95	0.95
Fat [%]	12.6714	5.18258
Fat [%]	14.7857	4.44451	14	-2.11429	5.60135	-1.41233	13	0.181343	-5.34841	1.11984
	paired samples t test
Variable
	Mean	STD	N	Difference	STD	t	df	p	Confidence	Confidence
					difference				-0.95	0.95
Fat mass [kg]	10.1357	4.95528
Fat mass [kg]	11.9	4.52735	14	-1.76429	4.56165	-1.44714	13	0.171538	-4.3981	0.869531
	paired samples t test
Variable
	Mean	STD	N	Difference	STD	t	df	p	Confidence	Confidence
					difference				-0.95	0.95
FFM [kg] - fat free mass	68.2571	8.46874
FFM [kg] - fat free mass	67.0357	7.06319	14	1.22143	3.93391	1.16174	13	0.266229	-1.04994	3.4928
	paired samples t test
Variable
	Mean	STD	N	Difference	STD	t	df	p	Confidence	Confidence
					difference				-0.95	0.95
MM [kg] - muscle mass	65.0643	8.0065
MM [kg] - muscle mass	64	7.02632	14	1.06429	3.75307	1.06105	13	0.307983	-1.10267	3.23124
	paired samples t test
Variable
	Mean	STD	N	Difference	STD	t	df	p	Confidence	Confidence
					difference				-0.95	0.95
TBW - Total Body Water [kg]	51.3071	6.58232
TBW - Total Body Water [kg]	47.5286	5.46618	14	3.77857	7.22263	1.95747	13	0.072112	-0.391653	7.9488
	wilcoxon matched pairs test
Variable
	N	T	Z	p
TBW% & TBW%	14	3	3.10744	0.001887
	Sign test
Variable
	N	Percent	Z	p
		v < V
TBW% & TBW%	14	14.2857	2.40535	0.016157
	wilcoxon matched pairs test
	N	T	Z	p
Bone mass [kg] & Bone mass [kg]	12	7.5	2.47106	0.013472
	Sign test
	N	Percent	Z	p
		v < V
Bone mass [kg] & Bone mass [kg]	12	91.6667	2.59808	0.009375
	wilcoxon matched pairs test
	N	T	Z	p
fecal pH & fecal pH	8	8	1.40028	0.16143
	wilcoxon matched pairs test
	N	T	Z	p
kcal & kcal	13	13	2.27128	0.02313
	Sign test
	N	Percent	Z	p
		v < V
kcal & kcal	13	76.9231	1.6641	0.096092
	paired samples t test
Variable
	Mean	STD	N	Difference	STD	t	df	p	Confidence	Confidence
					difference				-0.95	0.95
Dietary fat%	32.4228	5.04751
Dietary fat %	31.1433	6.16546	14	1.27954	5.27253	0.908029	13	0.380388	-1.76473	4.32381
	wilcoxon matched pairs test
	N	T	Z	p
Dietary protein %	13	14	2.2014	0.027709
	Sign test
	N	Percent	Z	p
		v < V
Dietary protein %	13	69.2308	1.1094	0.267258
	paired samples t test
Variable
	Mean	STD	N	Difference	STD	t	df	p	Confidence	Confidence
					difference				-0.95	0.95
Dietary carbohydrates %	52.211	4.92997
Dietary carbohydrates %	51.7612	5.16549	14	0.449756	5.58027	0.301568	13	0.767751	-2.7722	3.67171
	wilcoxon matched pairs test
	N	T	Z	p
Saccharose %	13	16	2.06163	0.039244
	Sign test
	N	Percent	Z	p
		v < V
Saccharose %	13	23.0769	1.6641	0.096092
	wilcoxon matched pairs test
	N	T	Z	p
Protein [g]	13	9	2.55083	0.010747
	Sign test
	N	Percent	Z	p
		v < V
Protein [g]	13	84.6154	2.2188	0.0265
	paired samples t test
Variable
	Mean	STD	N	Difference	STD	t	df	p	Confidence	Confidence
					difference				-0.95	0.95
Fat [g]	95.8014	40.6171
Fat [g]	99.7871	34.5697	14	-3.98568	24.1955	-0.616357	13	0.5483	-17.9557	9.98437
	wilcoxon matched pairs test
	N	T	Z	p
Dietary cholesterol [mg]	13	36	0.663914	0.506746
	wilcoxon matched pairs test
	N	T	Z	p
Saturated fatty acids	13	37	0.594028	0.552494
	wilcoxon matched pairs test
	N	T	Z	p
Monounsaturated fatty acids	13	44	0.104828	0.916512
	wilcoxon matched pairs test
	N	T	Z	p
polyunsaturated fatty acids	13	38	0.524142	0.60018
	paired samples t test
Variable
	Mean	STD	N	Difference	STD	t	df	p	Confidence	Confidence
					difference				-0.95	0.95
omega-3[g]	1.86278	0.94763
omega-3[g]	2.55191	1.00248	14	-0.68913	0.837479	-3.07887	13	0.008797	-1.17268	-0.205584
	wilcoxon matched pairs test
	N	T	Z	p
omega-6[g] & omega-6[g]	13	40	0.384371	0.700704
	wilcoxon matched pairs test
	N	T	Z	p
Carbohydrates [g]	13	13	2.27128	0.02313
	Sign test
	N	Percent	Z	p
		v < V
Carbohydrates [g]	13	69.2308	1.1094	0.267258
	wilcoxon matched pairs test
	N	T	Z	p
Fibre [g]	13	30	1.08323	0.278708
	wilcoxon matched pairs test
	N	T	Z	p
Starch [g]	13	6	2.76048	0.005772
	Sign test
	N	Percent	Z	p
		v < V
Starch [g]	13	84.6154	2.2188	0.0265
	wilcoxon matched pairs test
	N	T	Z	p
Lactose [g]	13	29	1.15311	0.248865
	paired samples t test
Variable
	Mean	STD	N	Difference	STD	t	df	p	Confidence	Confidence
					difference				-0.95	0.95
Saccharose [g]	69.2662	22.6481
Saccharose [g]	53.7813	24.1807	14	15.4849	30.6396	1.89099	13	0.081119	-2.20589	33.1757
	wilcoxon matched pairs test
	N	T	Z	p
IL-4 & IL-4[pg/ml]	9	6	1.95475	0.050613
	wilcoxon matched pairs test
	N	T	Z	p
IL-12 & IL-12[pg/ml]	13	36	0.663914	0.506746
	paired samples t test
Variable
	Mean	STD	N	Difference	STD	t	df	p	Confidence	Confidence
					difference				-0.95	0.95
TNF-alfa	21.0796	8.46809
TNF-alfa[pg/ml]	12.1858	5.23543	13	8.89385	11.5075	2.78664	12	0.016447	1.93995	15.8477
	paired samples t test
Variable
	Mean	STD	N	Difference	STD	t	df	p	Confidence	Confidence
					difference				-0.95	0.95
VO2 [ml/kg/min]	56.1	6.02852
VO2 [ml/kg/min]	51.4143	5.67435	14	4.68571	1.53114	11.4505	13	0	3.80166	5.56977
	paired samples t test
Variable
Variable
	Mean	STD	N	Difference	STD	t	df	p	Confidence	Confidence
					difference				-0.95	0.95
HR[bpm]	184.429	7.97799
HR [bpm]	184.214	8.00172	14	0.214286	4.56034	0.175817	13	0.863147	-2.41878	2.84735
	paired samples t test
Variable
	Mean	STD	N	Difference	STD	t	df	p	Confidence	Confidence
					difference				-0.95	0.95
Time [min]	18.8557	1.69332
Time [min]	17.8071	1.89065	14	1.04857	0.663544	5.91279	13	5.1e-05	0.665453	1.43169
	paired samples t test
Variable
	Mean	STD	N	Difference	STD	t	df	p	Confidence	Confidence
					difference				-0.95	0.95
Load [W]	370	32.3443
Load [W]	348.571	36.3439	14	21.4286	14.6009	5.49132	13	0.000104	12.9983	29.8589
	wilcoxon matched pairs test
	N	T	Z	p
HR [bpm] & HR [bpm]	13	43.5	0.139771	0.888841
	wilcoxon matched pairs test
	N	T	Z	p
Load [W] & Load [W]	9	17	0.651584	0.51467
	paired samples t test
Variable
	Mean	STD	N	Difference	STD	t	df	p	Confidence	Confidence
					difference				-0.95	0.95
Bifidocacterium spp._log	6.97692	0.677685
Bifidocacterium spp._log_2	7.08231	0.503242	13	-0.105385	0.62364	-0.609277	12	0.553701	-0.482247	0.271477
	paired samples t test
Variable
	Mean	STD	N	Difference	STD	t	df	p	Confidence	Confidence
					difference				-0.95	0.95
Bacteroides spp._log	8.80846	0.404286
Bacteroides spp._log_2	8.77385	0.400407	13	0.034615	0.480774	0.259597	12	0.799575	-0.255913	0.325144
	paired samples t test
Variable
	Mean	STD	N	Difference	STD	t	df	p	Confidence	Confidence
					difference				-0.95	0.95
F.prausnitzii_log	8.18539	0.47033
F.prausnitzii_log_2	8.37077	0.377767	13	-0.185385	0.552217	-1.21042	12	0.249421	-0.519086	0.148317
	wilcoxon matched pairs test
	N	T	Z	p
A.muciniphila_log & A.muciniphila_log_2	10	22	0.560612	0.575063

## Sheet: correlations 1
Both groups at baseline
	Spearman's rank correlation
Pair	Missing data removed pairwise
	N	R	t(N-2)	p
		Spearman
carbohydrates [g] & Bifidocacterium spp._log	25	0.292859	1.46891	0.155404
carbohydrates [g] & Bacteroides spp._log	25	-0.207234	-1.01591	0.320239
carbohydrates [g] & F.prausnitzii_log	25	0.07502	0.3608	0.721541
carbohydrates [g] & A.muciniphila_log	18	-0.178997	-0.72774	0.477287
carbohydrates [g] & fecal pH	25	0.104304	0.50297	0.619771
fibre [g] & Bifidocacterium spp._log	25	0.437647	2.33431	0.028676
fibre [g] & Bacteroides spp._log	25	-0.20335	-0.99604	0.329594
fibre [g] & F.prausnitzii_log	25	0.228928	1.12785	0.271011
fibre [g] & A.muciniphila_log	18	-0.262805	-1.08952	0.292064
fibre [g] & fecal pH	25	-0.12112	-0.58518	0.564124
Cyclists 1st term
	Spearman's rank correlation
Pair	Missing data removed pairwise
	N	R	t(N-2)	p
		Spearman
carbohydrates [g] & Bifidocacterium spp._log	14	0.512652	2.06835	0.060866
carbohydrates[g] & Bacteroides spp._log	14	0.223706	0.79509	0.442005
carbohydrates [g] & F.prausnitzii_log	14	-0.09956	-0.34661	0.734889
carbohydrates [g] & A.muciniphila_log	11	0.03653	0.10966	0.915083
carbohydrates [g] & fecal pH	14	-0.06832	-0.23722	0.816488
fibre [g] & Bifidocacterium spp._log	14	0.413642	1.57385	0.141504
fibre[g] & Bacteroides spp._log	14	0.536007	2.19942	0.048187
fibre [g] & F.prausnitzii_log	14	0.192482	0.67948	0.509726
fibre [g] & A.muciniphila_log	11	-0.465758	-1.579	0.148793
fibre [g] & fecal pH	14	-0.129571	-0.45266	0.658865
Control group
	Spearman's rank correlation
Pair	Missing data removed pairwise
	N	R	t(N-2)	p
		Spearman
carbohydrates [g] & Bifidocacterium spp._log	11	0.229891	0.70865	0.496485
carbohydrates [g] & Bacteroides spp._log	11	-0.374159	-1.21039	0.256955
carbohydrates [g] & F.prausnitzii_log	11	-0.077803	-0.23412	0.820131
carbohydrates [g] & A.muciniphila_log	7	-0.214286	-0.49055	0.644512
carbohydrates [g] & fecal pH	11	0.048962	0.14706	0.886325
Var. X &	Correlations
Var. Y
	Missing data was removed individually
	Mean	STD	r(X,Y)	r2	t	p	N	const.	tilt	const.	tilt
								Y	Y	X	X
fibre [g]	24.8239	14.0371
Bifidocacterium spp._log	6.94111	0.61867	0.451767	0.204093	2.02555	0.059825	18	6.44684	0.019911	-46.3242	10.2502
fibre [g]	24.8239	14.0371
Bacteroides spp._log	8.90667	0.37478	0.122278	0.014952	0.49281	0.628842	18	8.82562	0.003265	-15.9673	4.57986
fibre [g]	24.8239	14.0371
F.prausnitzii_log	8.06889	0.45625	0.168062	0.028245	0.68195	0.505025	18	7.93329	0.005463	-16.8975	5.17066
fibre [g]	24.8239	14.0371
A.muciniphila_log	6.12611	1.14231	-0.327916	0.107529	-1.38843	0.184034	18	6.78854	-0.026685	49.5094	-4.02955
fibre [g]	24.8239	14.0371
fecal pH	6.33333	0.5688	-0.067561	0.004565	-0.27086	0.789958	18	6.40129	-0.002738	35.3837	-1.66733
Cyclists 2nd term
	Spearman's rank correlation
Pair	Missing data removed pairwise
	N	R	t(N-2)	p
		Spearman
carbohydrates [g] & Bifidocacterium spp._log_2	13	0.504832	1.93965	0.078489
carbohydrates [g] & Bacteroides spp._log_2	13	0.54897	2.17832	0.052018
carbohydrates [g] & F.prausnitzii_log_2	13	0.489849	1.86354	0.089281
carbohydrates [g] & A.muciniphila_log_2	10	0.620064	2.23542	0.055823
carbohydrates [g] & fecal pH	13	0.265375	0.912881	0.380878
	Spearman's rank correlation
Pair	Missing data removed pairwise
	N	R	t(N-2)	p
		Spearman
fibre [g] & fecal pH	13	-0.113306	-0.37823	0.712457
Var. X &	Correlations
Var. Y
	Missing data was removed individually
	Mean	STD	r(X,Y)	r2	t	p	N	const.	tilt	const.	tilt
								Y	Y	X	X
fibre [g]	25.9388	11.3688
Bifidocacterium spp._log_2	7.086	0.49124	0.505476	0.255506	1.65697	0.136115	10	6.51946	0.021841	-56.955	11.6982
fibre [g]	25.9388	11.3688
Bacteroides spp._log_2	8.776	0.3968	0.412098	0.169824	1.27926	0.236659	10	8.40292	0.014383	-77.68	11.8071
fibre [g]	25.9388	11.3688
F.prausnitzii_log_2	8.374	0.43339	0.59486	0.353858	2.09313	0.069678	10	7.78579	0.022677	-104.733	15.6045
fibre [g]	25.9388	11.3688
A.muciniphila_log_2	6.279	1.26418	0.398479	0.158786	1.22884	0.254048	10	5.12965	0.04431	3.438	3.58352

## Sheet: correlations 2
Both groups at baseline
Var. X &	Correlations
Var. Y
	Mean	STD	r(X,Y)	r2	t	p	N	const.	tilt	const.	tilt
								Y	Y	X	X
VO2 [ml/kg/min]	48.896	10.6373
Bifidocacterium spp._log	6.9232	0.68285	0.039204	0.001537	0.18816	0.852402	25	6.80014	0.002517	44.668	0.6107
VO2 [ml/kg/min]	48.896	10.6373
Bacteroides spp._log	8.83	0.49308	-0.25116	0.063082	-1.24441	0.22588	25	9.39926	-0.011642	96.7399	-5.41834
VO2 [ml/kg/min]	48.896	10.6373
F.prausnitzii_log	8.0068	0.55325	0.243363	0.059225	1.2033	0.241099	25	7.38791	0.012657	11.4311	4.67914
	Spearman's rank correlation
Pair	Missing data removed pairwise
	N	R	t(N-2)	p
		Spearman
VO2 [ml/kg/min] & A.muciniphila_log	18	-0.409421	-1.79503	0.091561
Cyclists 1st term
Var. X &	Correlations
Var. Y
	Missing data was removed individually
	Mean	STD	r(X,Y)	r2	t	p	N	const.	tilt	const.	tilt
								Y	Y	X	X
VO2 [ml/kg/min]	56.1	6.02852
Bifidocacterium spp._log	6.90714	0.701498	0.041981	0.001762	0.145556	0.886689	14	6.63309	0.004885	53.608	0.36078
VO2 [ml/kg/min]	56.1	6.02852
Bacteroides spp._log	8.79357	0.392401	0.160278	0.025689	0.562492	0.584136	14	8.2083	0.010433	34.4469	2.46238
VO2 [ml/kg/min]	56.1	6.02852
F.prausnitzii_log	8.19357	0.452915	-0.19873	0.039494	-0.702433	0.49581	14	9.03116	-0.01493	77.7736	-2.6452
	Spearman's rank correlation
Para zmiennych	Missing data removed pairwise
	N	R	t(N-2)	p
		Spearman
VO2 [ml/kg/min] & A.muciniphila_log	11	-0.217392	-0.668155	0.5208
Control group
Var. X &	Correlations
Var. Y
	Mean	STD	r(X,Y)	r2	t	p	N	const.	tilt	const.	tilt
								Y	Y	X	X
VO2 [ml/kg/min]	39.7273	7.69339
Bifidocacterium spp._log	6.94364	0.69177	0.154206	0.023779	0.46822	0.650761	11	6.39279	0.013866	27.8191	1.71497
VO2 [ml/kg/min]	39.7273	7.69339
Bacteroides spp._log	8.87636	0.615715	-0.595214	0.35428	-2.22214	0.053377	11	10.7688	-0.047636	105.743	-7.43722
VO2 [ml/kg/min]	39.7273	7.69339
F.prausnitzii_log	7.76909	0.597435	-0.030127	0.000908	-0.09042	0.929932	11	7.86203	-0.00234	42.7413	-0.38796
VO2 [ml/kg/min]	39.6286	7.15419
A.muciniphila_log	6.40143	1.1102	-0.349766	0.122336	-0.83483	0.441863	7	8.55237	-0.054277	54.0568	-2.25391
Cyclists 2nd term
Var. X &	Correlations
Var. Y
	Mean	STD	r(X,Y)	r2	t	p	N	const.	tilt	const.	tilt
								Y	Y	X	X
VO2 [ml/kg/min]	51.5385	5.88622
Bifidocacterium spp._log_2	7.08231	0.503242	0.242806	0.058955	0.830137	0.424112	13	6.01244	0.020759	31.4247	2.84
VO2 [ml/kg/min]	51.5385	5.88622
Bacteroides spp._log_2	8.77385	0.400407	-0.156489	0.024489	-0.525491	0.609671	13	9.32248	-0.010645	71.7226	-2.30049
VO2 [ml/kg/min]	51.5385	5.88622
F.prausnitzii_log_2	8.37077	0.377767	-0.020889	0.000436	-0.069295	0.945998	13	8.43986	-0.001341	54.263	-0.32548
VO2 [ml/kg/min]	50.44	6.18263
A.muciniphila_log_2	6.279	1.26418	0.047231	0.002231	0.133739	0.896912	10	5.79188	0.009657	48.9896	0.23099

## Sheet: correlations 3
Both groups at baseline
	Spearman's rank correlation
Pair	Missing data removed pairwise
	N	R	t(N-2)	p
		Spearman
IL-4 & Bifidocacterium spp._log	19	-0.302552	-1.30879	0.208022
IL-4 & Bacteroides spp._log	19	0.154195	0.64346	0.528513
IL-4 & F.prausnitzii_log	19	-0.59551	-3.0564	0.007141
IL-4 & A.muciniphila_log	13	0.222834	0.75812	0.464313
IL-12 & Bifidocacterium spp._log	24	-0.135878	-0.64329	0.526684
IL-12 & Bacteroides spp._log	24	-0.04177	-0.19609	0.846341
IL-12 & F.prausnitzii_log	24	0.074164	0.34882	0.730539
IL-12 & A.muciniphila_log	18	-0.175039	-0.71114	0.487239
TNF-alfa & Bifidocacterium spp._log	21	0.042061	0.1835	0.856349
TNF-alfa & Bacteroides spp._log	21	-0.394362	-1.87058	0.076888
TNF-alfa & F.prausnitzii_log	21	-0.00262	-0.01142	0.991006
TNF-alfa & A.muciniphila_log	15	0.079821	0.28872	0.777349
Cyclists 1st term
	Spearman's rank correlation
Pair	Missing data removed pairwise
	N	R	t(N-2)	p
		Spearman
IL-4 & Bifidocacterium spp._log	9	-0.433333	-1.27214	0.243952
IL-4 & Bacteroides spp._log	9	-0.352954	-0.99806	0.351492
IL-4 & F.prausnitzii_log	9	-0.48536	-1.46874	0.185354
IL-4 & A.muciniphila_log	6	0.6	1.5	0.208
Var. X &	Correlations
Var. Y
	Mean	STD	r(X,Y)	r2	t	p	N	const.	tilt	const.	tilt
								Y	Y	X	X
IL-12	12.5779	1.1407
Bifidocacterium spp._log	6.90714	0.701498	-0.001883	4e-06	-0.00652	0.994903	14	6.92171	-0.001158	12.599	-0.0031
IL-12	12.5779	1.1407
Bacteroides spp._log	8.79357	0.392401	-0.332087	0.110282	-1.2196	0.246047	14	10.2304	-0.114238	21.0669	-0.9654
IL-12	12.5779	1.1407
F.prausnitzii_log	8.19357	0.452915	-0.136205	0.018552	-0.47627	0.642439	14	8.87379	-0.05408	15.3886	-0.343
TNF-alfa	21.0796	8.46809
Bifidocacterium spp._log	6.90769	0.730139	0.150481	0.022644	0.50484	0.623634	13	6.63419	0.012975	9.0239	1.7453
TNF-alfa	21.0796	8.46809
Bacteroides spp._log	8.77769	0.403715	-0.567457	0.322008	-2.28569	0.043103	13	9.34797	-0.027053	125.557	-11.9026
TNF-alfa	21.0796	8.46809
F.prausnitzii_log	8.20846	0.467829	-0.285645	0.081593	-0.98857	0.344122	13	8.54111	-0.015781	63.5207	-5.1704
	Spearman's rank correlation
Pair	Missing data removed pairwise
	N	R	t(N-2)	p
		Spearman
IL-12 & A.muciniphila_log	11	0.150687	0.457281	0.658307
TNF-alfa & A.muciniphila_log	10	0.437311	1.37539	0.206291
Control group
Var. X &	Correlations
Var. Y
	Mean	STD	r(X,Y)	r2	t	p	N	const.	tilt	const.	tilt
								Y	Y	X	X
IL-4	4.99887	3.03197
Bifidocacterium spp._log	7.008	0.693603	-0.56105	0.314777	-1.91704	0.091533	10	7.64959	-0.128347	22.1863	-2.45254
IL-4	4.99887	3.03197
Bacteroides spp._log	8.816	0.613753	0.323043	0.104357	0.96547	0.362586	10	8.48911	0.065393	-9.0701	1.59585
IL-4	4.99887	3.03197
F.prausnitzii_log	7.846	0.569468	-0.570089	0.325002	-1.96262	0.085312	10	8.38125	-0.107075	28.8137	-3.03528
IL-4	5.47974	3.288
A.muciniphila_log	6.40143	1.1102	-0.450601	0.203041	-1.12865	0.31027	7	7.23515	-0.152147	14.0225	-1.33451
TNF-alfa	13.9806	2.85875
Bifidocacterium spp._log	7.01	0.691747	0.360582	0.13002	0.94695	0.380226	8	5.79016	0.087252	3.53458	1.49016
TNF-alfa	13.9806	2.85875
Bacteroides spp._log	8.7375	0.643512	-0.30745	0.094526	-0.79143	0.458828	8	9.70507	-0.069208	25.9145	-1.36583
TNF-alfa	13.9806	2.85875
F.prausnitzii_log	7.885	0.629013	0.08591	0.00738	0.21122	0.83971	8	7.62073	0.018903	10.902	0.39044
TNF-alfa	13.233	3.27768
A.muciniphila_log	6.502	1.06926	0.784539	0.615501	2.19143	0.116099	5	3.11519	0.255936	-2.40364	2.4049
	Spearman's rank correlation
Pair	Missing data removed pairwise
	N	R	t(N-2)	p
		Spearman
IL-12 & Bifidocacterium spp._log	10	-0.420732	-1.31176	0.225992
IL-12 & Bacteroides spp._log	10	0.259279	0.75932	0.469442
IL-12 & F.prausnitzii_log	10	-0.159022	-0.45558	0.660803
IL-12 & A.muciniphila_log	7	-0.630656	-1.81711	0.128888
Cyclists 2nd term
Var. X &	Correlations
Var. Y
	Mean	STD	r(X,Y)	r2	t	p	N	const.	tilt	const.	tilt
								Y	Y	X	X
IL-4[pg/ml]	4.16425	2.10568
Bifidocacterium spp._log_2	7.08231	0.503242	-0.402016	0.161617	-1.45619	0.173282	13	7.4824	-0.096079	16.0776	-1.68213
IL-4[pg/ml]	4.16425	2.10568
Bacteroides spp._log_2	8.77385	0.400407	-0.663345	0.440027	-2.94003	0.013447	13	9.29912	-0.126139	34.7713	-3.48844
IL-4[pg/ml]	4.16425	2.10568
F.prausnitzii_log_2	8.37077	0.377767	-0.487539	0.237695	-1.852	0.091031	13	8.735	-0.087466	26.9123	-2.71756
IL-4[pg/ml]	4.58972	2.19495
A.muciniphila_log_2	6.279	1.26418	0.043022	0.001851	0.1218	0.906063	10	6.16527	0.024779	4.1207	0.0747
TNF-alfa[pg/ml]	12.3896	5.25931
Bifidocacterium spp._log_2	7.08231	0.503242	0.412366	0.170045	1.50124	0.16144	13	6.59344	0.039458	-18.1321	4.30957
TNF-alfa[pg/ml]	12.3896	5.25931
Bacteroides spp._log_2	8.77385	0.400407	-0.146529	0.021471	-0.49128	0.632881	13	8.91206	-0.011156	29.2761	-1.92464
TNF-alfa[pg/ml]	12.3896	5.25931
F.prausnitzii_log_2	8.37077	0.377767	0.070052	0.004907	0.23291	0.820109	13	8.30843	0.005032	4.2258	0.97528
TNF-alfa[pg/ml]	11.986	5.89534
A.muciniphila_log_2	6.279	1.26418	0.264643	0.070036	0.7762	0.459963	10	5.5988	0.056749	4.2369	1.23413
	Spearman's rank correlation
Pair	Missing data removed pairwise
	N	R	t(N-2)	p
		Spearman
IL-12[pg/ml] & Bifidocacterium spp._log_2	12	-0.10545	-0.335331	0.744304
IL-12[pg/ml] & Bacteroides spp._log_2	12	0.077193	0.244838	0.811533
IL-12[pg/ml] & F.prausnitzii_log_2	12	-0.149592	-0.478433	0.64263
IL-12[pg/ml] & A.muciniphila_log_2	10	0.401218	1.2389	0.250496
